# Supplementary material
Source: PubMed Central journal article supplement (PMC5854635)
Supplement: JZUSB19-0199-ESM.pdf [file JZUSB19-0199-ESM.pdf]

Supplementary materials

## In vitro antioxidant activity of phenolic-enriched extracts from Zhangping Narcissus tea cake and their inhibition on growth and metastatic capacity of 4T1 murine breast cancer cells\*

Le YING, De-dong KONG, Yuan-yuan GAO, Feng YAN, Yue-fei WANG, Ping XU

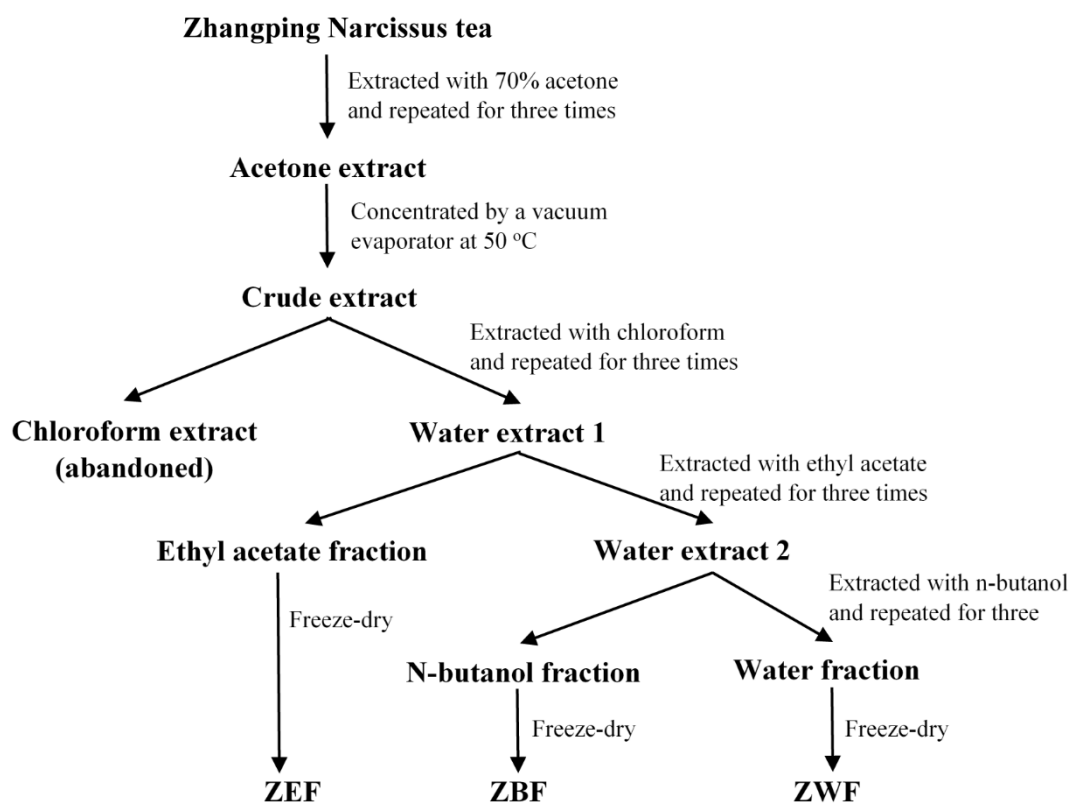

Fig. S1 Flow chart of phenolic-enriched extracts from Zhangping Narcissus tea cake

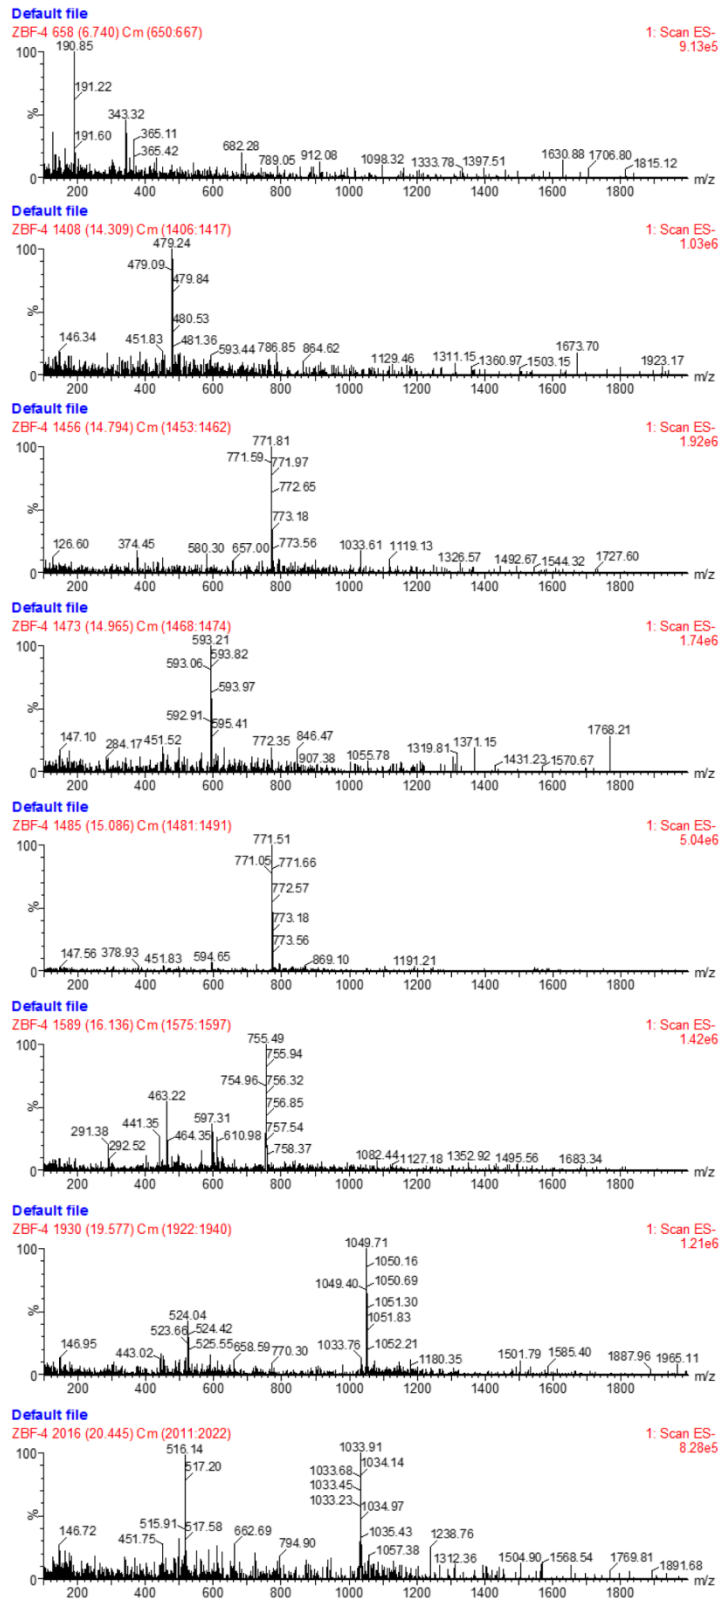

Fig. S2 UPLC-MS chromatograms of ZBF

Default file

ZEF-4-2 1484 (15.076) Cm (1478:1494)

1: Scan ES-  
1.29e6

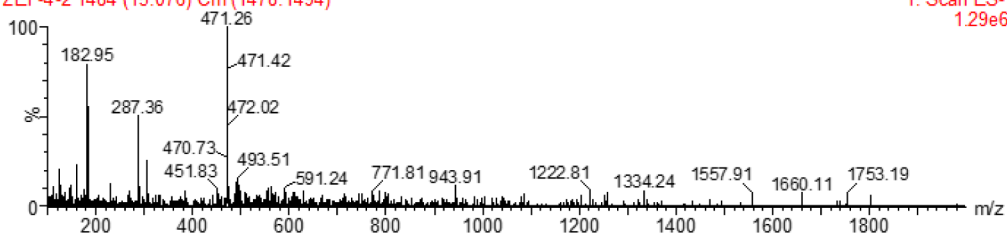

Default file

ZEF-4-2 2044 (20.728) Cm (2036:2056)

1: Scan ES-  
1.08e6

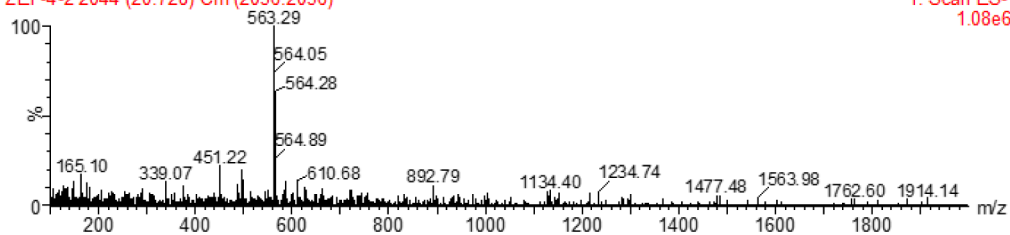

Fig. S3 UPLC-MS chromatograms of ZEF
